# Supplementary material for: pH-Responsive expandable polycarbonate–doxorubicin conjugate nanoparticles for fast intracellular drug release
Source: Royal Society of Chemistry journal article supplement (doi:10.1039/d1nj00598g), 2021-01-01
Supplement: d1nj00598g1.pdf [file d1nj00598g1.pdf]

# New Journal of Chemistry

## Supporting Information

### pH-Responsive expandable polycarbonate-doxorubicin conjugate nanoparticles for fast intracellular drug release

Enhui Liang<sup>a</sup>, Zhihao Guo<sup>a</sup>, Zhuang Hu<sup>a</sup>, Zhangpei Chen<sup>a</sup>, Aikebaier Rehemani<sup>b\*</sup>, Jiwei Wang<sup>c</sup>, Jianshe Hu<sup>a\*</sup>

<sup>a</sup>Center for Molecular Science and Engineering, College of Science, Northeastern University, Shenyang, 110819, P. R. China.

<sup>b</sup>Key Laboratory of Toxicology, Medical College, Ningde Normal University, Ningde, 352100, P. R.China.

<sup>c</sup>Fujian Province University Engineering Research Center of Mindong She Medicine, Medical College, Ningde Normal University, Ningde, Fujian 352100, P. R. China.

#### Additional Figures

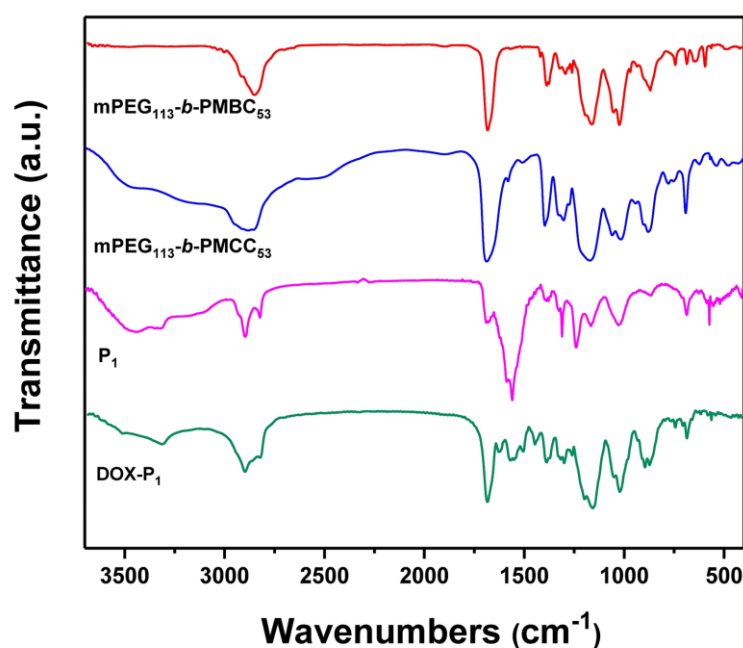

Fig. S1 FT-IR spectra of the synthetic products.

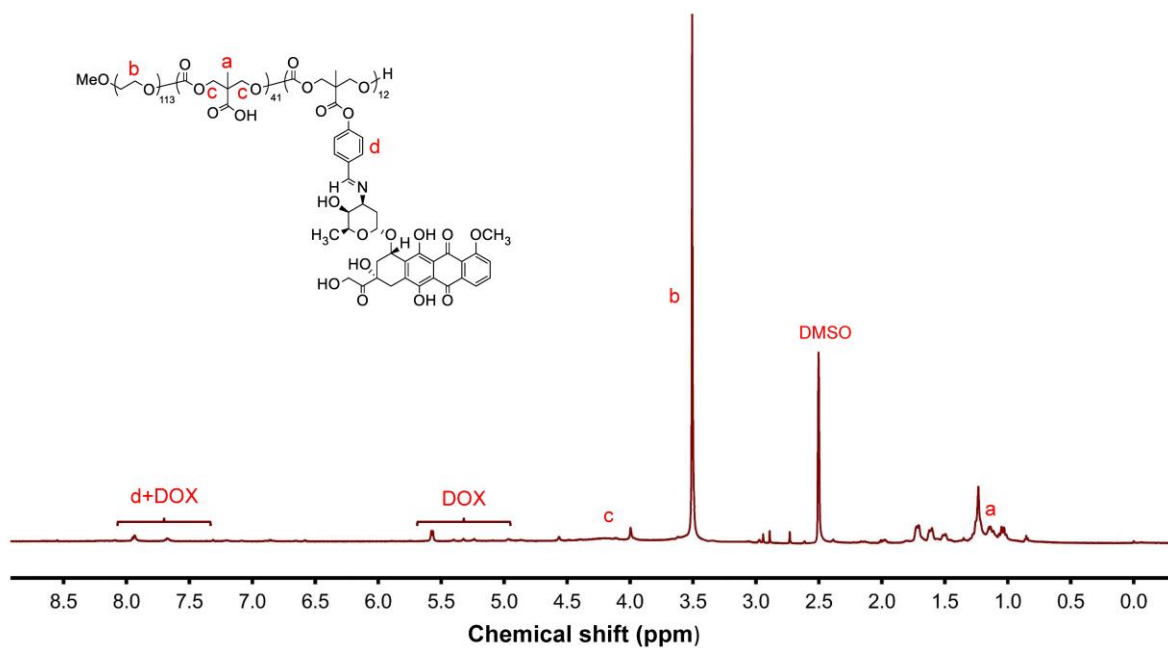

Fig. S2  $^1\text{H}$  NMR spectrum of DOX- $\text{P}_2$  in DMSO.

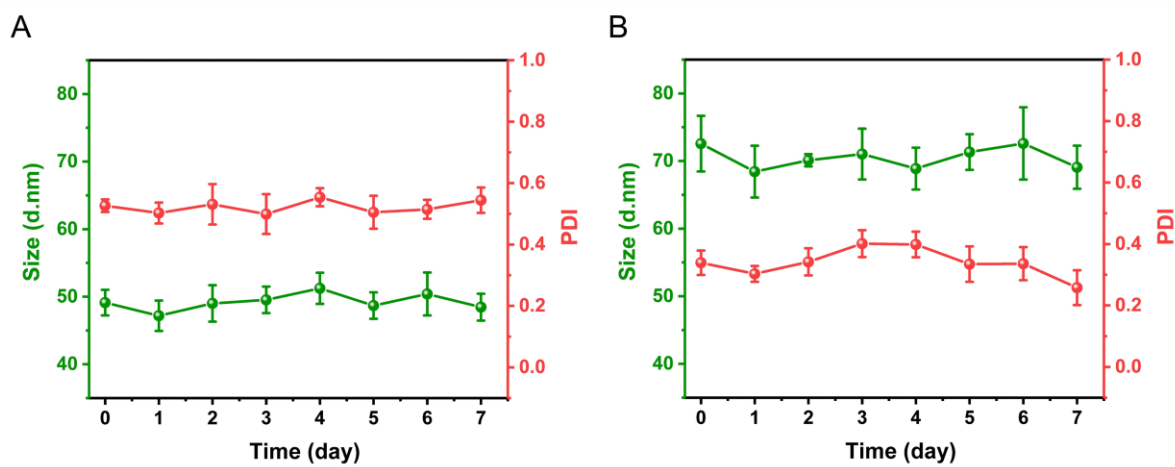

Fig. S3 Size and PDI variation trend of DOX- $\text{P}_1$  NPs (A) and DOX- $\text{P}_2$  NPs (B) incubated at pH 7.4 for 7 days.

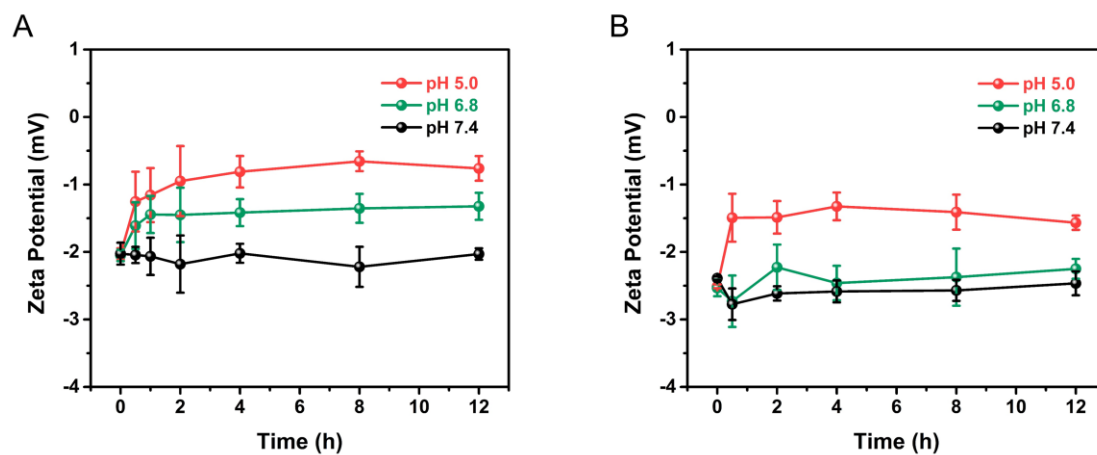

Fig. S4 Zeta potential variation of DOX-P<sub>1</sub> NPs (A) and DOX-P<sub>2</sub> NPs (B) at different pH.

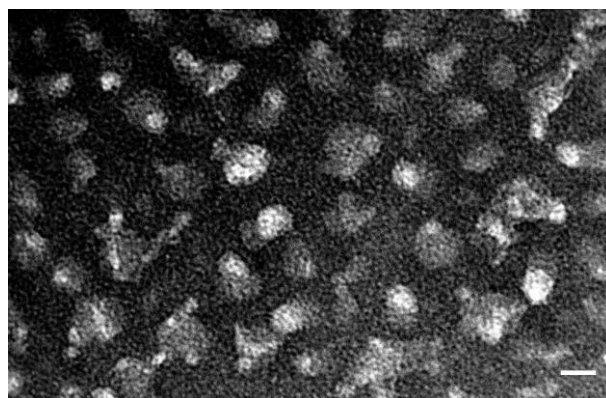

Fig. S5 TEM image of DOX-P<sub>1</sub> NPs at pH 5.0. Scale bar: 20 nm.
